# Supplementary material for: Dubiously increased FT4 and FT3 levels in clinically euthyroid patients: clinical finding or analytical pitfall?
Source: publisher site journal article supplement (doi:10.1515/cclm-2021-1211), 2022-02-25
Supplement: Supplementary file 1 [file j_cclm-2021-1211_suppl_003.docx]

| **Antihypertensive drugs**  ACE-Inhibitor Ramipril (13) Enalapril (1)  AT1-Antagonist Valsartan (7) Candesartan (3) Losartan (1)  Beta blocker Metoprolol (15) Bisoprolol (12) Nebivolol (3) Propanolol (2)  Calcium Antagonist Amlodipine (7) Lercanidipine (1)  Others Spironolactone (3) Moxonidine (1)  **Diuretics**  Hydrochlorothiazide (8) Torasemid (8) **Furosemide (5)* Triamteren (1)  **Thyroid medication**  L-Thyroxine (24) Methamizole (2) | **Immunomodulators**  Glucocorticoids Dexamethasone (5) Prednisolone (1) Hydrocortisone (3) Prednisone (1) Fluticasone (1)  Immunsupressive Drugs Mycophenolate (4) Tacrolimus (3) Sirolimus (1)  Monoclonal antibodies Denosumab (2) Rituximab (2) Nivolumab (2) Trastuzumab (2) Omalizumab (1) Pembrolizumab (1)  **Antidepressants**  Duloxetine (1) Sertraline (1) Tianeptine (1) Paroxetine (1) Pregabalin (1) Amitriptyline (1) Citalopram (1)  **Antiepilepics**  Levetiracetam (3) Lamotrigine (2) Valproate (1) Gabapentin (1) | **Antibiotics**  Cotrimoxacole (2) Imipenem (1) Tygacil (1) Amikacin (1) Levofloxacin (1) Amoxicillin (1) Gentamycin (1) Ampicillin / Sulbactam (1)  Virustatic Valganciclovir (2)  Antimycotic Voriconazole (1)  **Painkillers**  Non-opioid Novaminsulfone (14) Ibuprofen (4) Paracetamol (3) Celecoxib (2)  Opioid Hydromorphone (3) Morphine (1) Tilidine (1) Tapentadol (1)  **Lipid lowering drugs**  Simvastatin (11) Atorvastatin (2) Pravastatin (1)  **Antidiabetic drugs**  Metformin (4) Sitaglipitin (4) | **Anticoagulants**  Heparins **Heparin unfractioned (14) *Tinzaparin (11) *Dalteparin (1) *Fraxiparin (1)*  Oral anticoagulants **ASS 100 (12)* Apixaban (3) Fondaparinux (2) Clopidogrel (2) Rivaroxaban (2) Phenprocoumon (8)  **Vitamins/Electrolytes**  Vitamin D (6) Calcium (6) Magnesium (2) Vitamin B1 + B6 (2) Potassium (1) Iron (1) Folic Acid (1) Vitamin B12 (1)  **Others**  Pantoprazole (18) Amiodarone (3) Digitoxin (2) Levodopa (1) Metoclopramide (1) Tamoxifen (1) Alendronate (1) Tamsulosin (1) Montekulast (1) Rivastigmin (1) |
| --- | --- | --- | --- |

**Supplemental Table 3:** Diagnoses of patients (n=120) with dubiously increased thyroid hormone levels and their frequency. The values ​​in parentheses indicate the exact number of the diagnosis.
